# Supplementary material
Source: PubMed Central journal article supplement (PMC6013386)
Supplement: NIHMS961765-supplement-Supp_info.pdf [file NIHMS961765-supplement-Supp_info.pdf]

**Table S1.**  $\Delta$ GDT-HA,  $\Delta$ RMSD, MolProbity,  $\Delta$ SphereGrinder values after refinement from sampling in the presence of lipid bilayers with HDGB-based scoring functions using different membrane widths according to predicted hydrophobic lengths.

|                                | 1j4n  | 1py6  | 1qj8  | 3odu  | 3vg9  | 4hyj  | 4kr8  | 4n6h  | Ave.       |
|--------------------------------|-------|-------|-------|-------|-------|-------|-------|-------|------------|
| $\Delta$ GDT-HA                |       |       |       |       |       |       |       |       |            |
| HDGBv3-hl                      | 1.21  | 2.64  | 10.98 | 2.07  | -2.44 | 1.48  | -2.13 | 3.13  | 2.12±1.46  |
| HDGBvdW-hl                     | 1.31  | 3.42  | 10.98 | 1.49  | -2.18 | 1.06  | -1.54 | 3.05  | 2.20±1.43  |
| $\Delta$ RMSD [ $\text{\AA}$ ] |       |       |       |       |       |       |       |       |            |
| HDGBv3-hl                      | -0.12 | -0.06 | -0.45 | -0.12 | -0.01 | -0.06 | -0.04 | -0.23 | -0.14±0.05 |
| HDGBvdW-hl                     | -0.10 | -0.07 | -0.45 | -0.12 | -0.01 | -0.06 | -0.03 | -0.24 | -0.13±0.05 |
| MolProbity                     |       |       |       |       |       |       |       |       |            |
| HDGBv3-hl                      | 0.93  | 0.56  | 0.65  | 1.50  | 0.92  | 0.78  | 0.96  | 0.60  | 0.86±0.11  |
| HDGBvdW-hl                     | 0.97  | 0.64  | 0.65  | 1.52  | 0.84  | 0.78  | 0.79  | 0.50  | 0.84±0.11  |
| $\Delta$ SphereGrinder         |       |       |       |       |       |       |       |       |            |
| HDGBv3-hl                      | -0.43 | 0.47  | 12.15 | -1.08 | 0.18  | -1.58 | 1.35  | 0.71  | 1.47±1.56  |
| HDGBvdW-hl                     | -0.21 | 0.47  | 11.8  | -1.26 | 0.54  | -1.36 | 0.9   | 0.89  | 1.47±1.51  |

hl denotes 'hydrophobic length'

**Table S2.**  $\Delta$ GDT-HA,  $\Delta$ RMSD, MolProbity,  $\Delta$ SphereGrinder values after refinement from sampling in the presence of aqueous solvent with HDGB-based scoring functions using different membrane widths according to predicted hydrophobic lengths.

|                                | 1j4n  | 1py6  | 1qj8  | 3odu  | 3vg9  | 4hyj  | 4kr8  | 4n6h  | Ave.              |
|--------------------------------|-------|-------|-------|-------|-------|-------|-------|-------|-------------------|
| $\Delta$ GDT-HA                |       |       |       |       |       |       |       |       |                   |
| HDGBv3-hl                      | 2.51  | 5.07  | 8.61  | 1.24  | -0.08 | 3.81  | 0.66  | -0.17 | <b>2.71±1.07</b>  |
| HDGBvdW-hl                     | 2.61  | 4.63  | 9.80  | 1.16  | -0.67 | 3.92  | 0.88  | -0.09 | <b>2.78±1.20</b>  |
| $\Delta$ RMSD [ $\text{\AA}$ ] |       |       |       |       |       |       |       |       |                   |
| HDGBv3-hl                      | -0.13 | -0.09 | -0.33 | -0.06 | -0.06 | -0.11 | -0.14 | -0.14 | <b>-0.13±0.03</b> |
| HDGBvdW-hl                     | -0.14 | -0.08 | -0.34 | -0.06 | -0.05 | -0.12 | -0.13 | -0.13 | <b>-0.13±0.03</b> |
| MolProbity                     |       |       |       |       |       |       |       |       |                   |
| HDGBv3-hl                      | 0.93  | 1.05  | 0.97  | 1.62  | 0.92  | 0.87  | 0.81  | 0.53  | <b>0.96±0.11</b>  |
| HDGBvdW-hl                     | 0.93  | 0.80  | 1.05  | 1.59  | 0.92  | 0.92  | 0.74  | 0.50  | <b>0.93±0.11</b>  |
| SphereGrinder                  |       |       |       |       |       |       |       |       |                   |
| HDGBv3-hl                      | 1.1   | -0.48 | 6.59  | -1.44 | 0.36  | -1.13 | 2.41  | 1.59  | <b>1.13±0.91</b>  |
| HDGBvdW-hl                     | 1.75  | -1.19 | 6.59  | -1.26 | -0.71 | -1.36 | 1.81  | 1.24  | <b>0.86±0.95</b>  |

hl denotes 'hydrophobic length'
